# Supplementary material for: Bifluoride ([HF2]−) formation at the fluoridated aluminium hydroxide/water interface
Source: Royal Society of Chemistry journal article supplement (doi:10.1039/c5dt04425a), 2016-01-01
Supplement: c5dt04425a1.pdf [file c5dt04425a1.pdf]

## **SUPPLEMENTARY INFORMATION**

### **Bifluoride ( $[\text{HF}_2]^-$ ) formation at the fluoridated aluminium hydroxide/water interface**

Kenichi Shimizu, Gordon W. Driver, Marie Lucas, Tobias Sparrman, Andrey Shchukarev, Jean-François Boily\*

Department of Chemistry, Umeå University, SE-901 87 Umeå, Sweden  
\*jean-francois.boily@chem.umu.se

**Table S1.** Peak binding energies at the gibbsite/water interface.

| mL <sup>a</sup>                                                                          | pH   | Na 1s <sub>1</sub> | Na 1s <sub>2</sub> | F 1s <sub>1</sub> | F 1s <sub>2</sub> | O 1s OH    | O 1s H <sub>2</sub> O | Al 2p     |
|------------------------------------------------------------------------------------------|------|--------------------|--------------------|-------------------|-------------------|------------|-----------------------|-----------|
| <b>Gibbsite in 50 mM NaF + HF</b>                                                        |      |                    |                    |                   |                   |            |                       |           |
| 0                                                                                        | 8.65 | 1071.6(1.7)        |                    | 684.9(2.0)        |                   | 532.1(1.6) | 533.4(1.8)            | 74.5(1.5) |
| 0.3                                                                                      | 7.92 | 1071.5(1.5)        | 1073.3(3.3)        | 684.9(2.1)        | 687.6(2.7)        | 532.0(1.6) | 533.3(1.8)            | 74.5(1.6) |
| 0.64                                                                                     | 8.41 | 1071.6(1.6)        | 1073.2(3.3)        | 685.0(2.0)        | 687.1(3.2)        | 532.2(1.6) | 533.4(1.8)            | 74.6(1.5) |
| 1.3                                                                                      | 8.51 | 1071.6(1.6)        | 1073.8(2.9)        | 685.1(2.1)        | 687.5(2.7)        | 532.0(1.6) | 533.3(1.8)            | 74.5(1.5) |
| 0.04 <sup>b</sup>                                                                        | 9.74 | 1071.4(1.6)        |                    | 684.8(1.9)        |                   | 532.2(1.6) | 533.4(1.8)            | 74.6(1.6) |
| <b>Gibbsite in 50 mM NaF + 1.2 mL (HClO<sub>4</sub> + NaClO<sub>4</sub>)<sup>c</sup></b> |      |                    |                    |                   |                   |            |                       |           |
| 0                                                                                        | 7.80 | 1071.7(1.7)        |                    | 685.0(2.1)        |                   | 532.1(1.6) | 533.4(1.8)            | 74.6(1.5) |
| 0.3                                                                                      | 8.16 | 1071.7(1.6)        | 1073.0(3.0)        | 685.0(2.0)        | 687.0(3.6)        | 532.0(1.6) | 533.3(1.8)            | 74.5(1.4) |
| 0.6                                                                                      | 8.07 | 1071.7(1.6)        | 1073.6(3.5)        | 685.1(2.1)        | 687.9(3.0)        | 532.2(1.6) | 533.5(1.8)            | 74.6(1.5) |
| 0.9                                                                                      | 7.58 | 1071.7(1.7)        | 1073.8(3.4)        | 685.2(2.2)        | 687.8(3.0)        | 532.1(1.6) | 533.4(1.8)            | 74.6(1.5) |
| 1.2                                                                                      | 7.67 | 1071.8(1.6)        | 1073.9(2.6)        | 685.2(2.0)        | 687.7(2.5)        | 532.0(1.6) | 533.4(1.8)            | 74.5(1.3) |

*Procedure (cf. Section 2.2 of paper):* Aqueous suspensions of gibbsite (4.5 g/L) in 50 mM NaF and NaClO<sub>4</sub> were prepared at least two days prior cryogenic XPS measurements. HF, HClO<sub>4</sub> or NaOH were added to 5 mL aliquots of the gibbsite suspension and equilibrated overnight under an atmosphere of water-saturated N<sub>2</sub>(g).

Peak binding energies referred to the C 1s peak at 285.0 eV. The peak binding energies of Cl 2p of [ClO<sub>4</sub>], 208.8 ± 0.1 eV, are excluded from the table.

Numbers in parentheses indicate the full width at half maximum.

<sup>a</sup> volume of acid added.

<sup>b</sup> 50 mM NaOH was added instead of the acid.

<sup>d</sup> sum of the volumes of HClO<sub>4</sub> and NaClO<sub>4</sub> added are constant at 1.2 mL

**Table S2.** Peak binding energy of elements in reference materials.

|                                   | Na 1s       | F 1s <sub>1</sub> | F 1s <sub>2</sub> | C 1s CH    | O 1s OH    | O 1s H <sub>2</sub> O | Al 2p     |
|-----------------------------------|-------------|-------------------|-------------------|------------|------------|-----------------------|-----------|
| Gibbsite (solid)                  |             |                   |                   | 285.0(1.7) | 531.7(1.6) | 533.1(1.8)            | 74.2(1.5) |
| Gibbsite (wet) <sup>a</sup>       |             |                   |                   | 285.0(1.7) | 532.1(1.6) | 533.4(1.8)            | 74.6(1.5) |
| NaF (140 mM) <sup>a</sup>         |             | 684.8(1.7)        | 686.3(2.3)        | 285.0(1.2) |            | 533.1(1.4)            |           |
| HF <sup>a,b</sup>                 |             | 685.3             | 686.6             |            |            |                       |           |
| NaF (solid)                       | 1071.4(1.8) | 684.6(1.6)        |                   | 285.0(1.7) |            |                       |           |
| Cryolite (solid)                  | 1071.8(1.6) | 685.2(1.4)        |                   | 285.0(1.4) |            |                       | 75.2(1.4) |
| Na[HF <sub>2</sub> ] <sup>a</sup> | 1071.5(1.9) | 684.3(1.6)        | 685.7(2.9)        | 285.0(1.7) |            |                       |           |

The peak binding energies are referred to C 1s at 285.0 eV

Numbers in parentheses indicate the full width at half maximum.

<sup>a</sup> Gibbsite centrifuged wet (ultrapure water) paste.

<sup>b</sup> From Shimizu et al.<sup>1</sup>

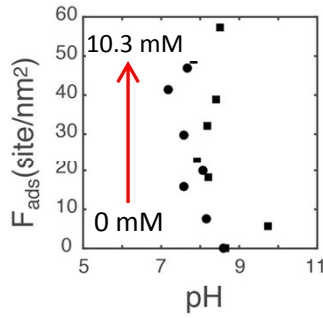

**Figure S1.** Fluoride removal from aqueous suspensions of gibbsite (4.5 g/L) in 50 mM NaF.

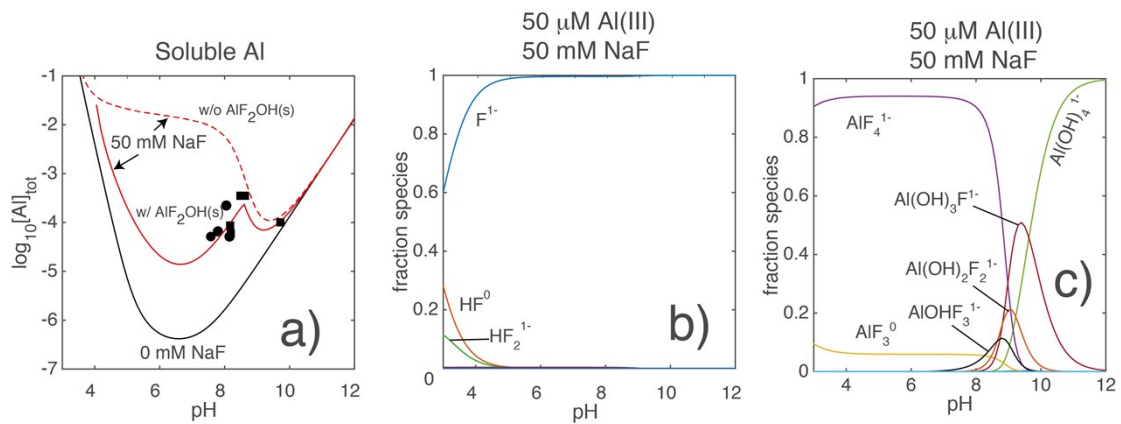

**Figure S2.** Gibbsite solubility in 0 and 50 mM NaF (a). Fluoride (b) and aluminum (c) speciation in a solution containing 50  $\mu\text{M}$  dissolved Al(III) in 50 mM NaF, showing that  $\text{F}^{1-}$  is the predominant fluoride species under the conditions of this study. Thermodynamic speciation calculations of the Al(III)-F(I)- $\text{H}_2\text{O}$  system (298 K,  $I=0$ ), using equations and constants listed in Bodor *et al.*<sup>2</sup>. Values for  $\text{Na}_3\text{AlF}_6(\text{s})$  and  $\text{AlF}_3(\text{s})$  solubility are taken from Nordin *et al.*<sup>3</sup>, and the one for  $\text{AlF}_2(\text{OH})(\text{s})$  from Ntuk *et al.*<sup>4</sup>. Soluble Al (a) and F (b) show mismatch between classical models and measurements.

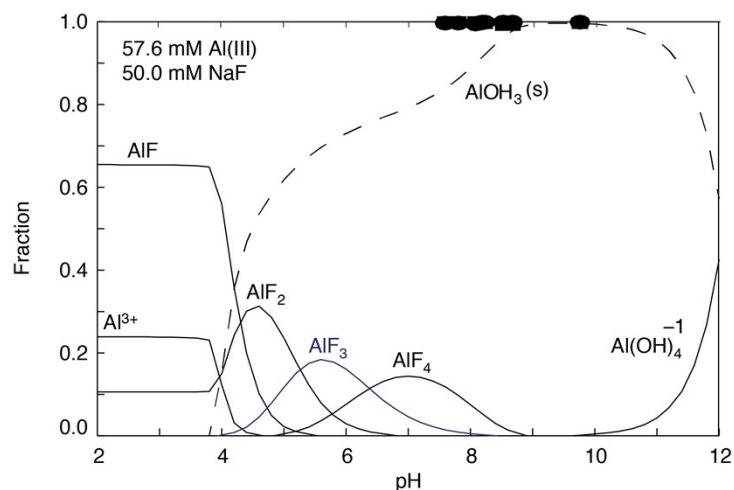

**Figure S3.** Data points in the pH 7.6-9.7 range correspond to the total insoluble Al in the samples under study. Thermodynamic speciation calculations of the Al(III)-F(I)-H<sub>2</sub>O system (298 K, I=0), using equations and constants listed in Bodor *et al.*<sup>2</sup>. Values for Na<sub>3</sub>AlF<sub>6</sub>(s) and AlF<sub>3</sub>(s) solubility are taken from Nordin *et al.*<sup>3</sup>

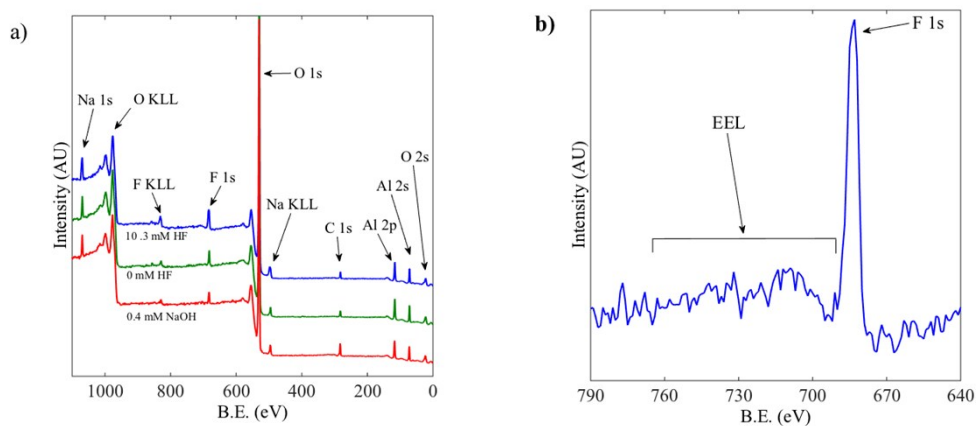

**Figure S4.** Wide XPS spectra over the entire binding energy range (a) and in the F 1s region of wet gibbsite particles reacted in NaF solutions containing 10.3 mM HF (blue), 0 mM HF (red) and 0.4 mM NaOH (green), and under a constant total ionic strength of 50 mM (Na)F.

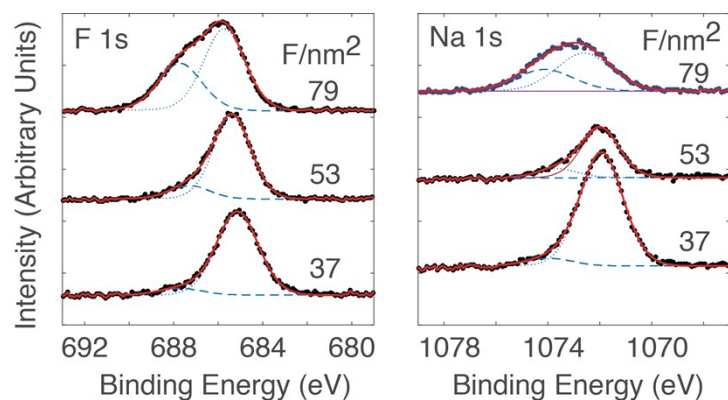

**Figure S5.** Narrow (left) F 1s and (right) Na 1s regions of wet bayerite particles reacted in NaF solutions at various HF and under a constant total ionic strength of 50 mM (Na)F. Fluoride loadings were derived from ISE measurements. Blue dashed lines are component fits and red full lines total fits to experimental data.

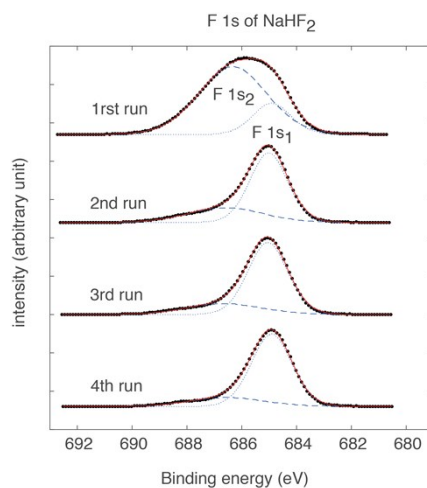

**Figure S6.** Room temperature XPS spectra of the F 1s region of sodium bifluoride. Four consecutive runs of measurements *in vacuo* show the progressive decomposition of the bifluoride anion (F 1s<sub>2</sub> at 687 eV) to that of fluoride (F 1s<sub>1</sub> at 685 eV).

## References

- (1) Shimizu, K.; Shchukarev, A.; Kozin, P. A.; Boily, J. F. *Langmuir* **2013**, *29*, 2623.
- (2) Bodor, A.; Toth, I.; Banyai, I.; Zekany, L. S.; Sjoberg, S. *Geochim. Cosmochim. Acta* **2003**, *67*, 2793.
- (3) Nordin, J. P.; Sullivan, D. J.; Phillips, B. L.; Casey, W. H. *Geochim. Cosmochim. Acta* **1999**, *63*, 3513.
- (4) Ntuk, U.; Tait, S.; White, E. T.; Steel, K. M. *Hydrometallurgy* **2015**, *155*, 79.
